# Supplementary material
Source: publisher figshare collection journal article supplement (https://gsapubs.figshare.com/articles/dataset/_/19795447)
Supplement: Supplementary file 1 [file 1]

## Sheet: U-Pb_geochronology_compilation_
Lat	Lon	Precision	Age	Uncertaint	Sample_No	Uplift	Method	Unit	Reference	Interpretation
41.025	-106.86	high	1627	± 4	82-08	Sierra Madre WY	zircon TIMS	White quartz monzonite	Premo & VanSchmus 1989	Magmatic age
41.0451	-106.655	high	1627	± 4	SM063	Sierra Madre WY	zircon SHRIMP-RG	Amphibolite	Jones et al. 2013	Magmatic age
41.009	-106.56	high	1628	± 11	WRP 81-25	Sierra Madre WY	zircon SHRIMP-RG	White quartz monzonite	Jones et al. 2013	Magmatic age
41.0321	-106.683	high	1631	± 8	SM329	Sierra Madre WY	zircon SHRIMP-RG	White quartz monzonite-pegmatite	Jones et al. 2013	Magmatic age
41.0153	-106.508	high	1645	± 7	SM294-WQM	Sierra Madre WY	zircon SHRIMP-RG	White quartz monzonite rims	Jones et al. 2013	Magmatic age
39.94	-105.347	high	1670	±4	83-03	Front Range CO	zircon TIMS	Front Range	Premo & VanSchmus 1989	Magmatic age
39.9433	-105.348	high	1672	±8	83-02	Front Range CO	zircon TIMS	Boulder Ck qz monzonite	Premo & VanSchmus 1989	Magmatic age
40.8557	-112.175	high	1691	±26	01FCC8	Antelope Island UT	zircon SHRIMP	Biotite gneiss	Nelson et al. 2011	Age of igneous or sedimentary protolith
40.0333	-105.315	high	1714	±6	83-01	Front Range CO	zircon TIMS	Boulder Creek granodiorite	Premo & VanSchmus 1989	Magmatic age
42.598	-104.477	medium	1714	± 2	RB-Peg	Hartville Uplift WY	zircon TIMS	Syn-deformation pegmatite	Krugh 1997	Synkinematic magmatic age
43.844	-103.566	medium	1715	± 3	Harney Peak granite	Black Hills SD	monazite TIMS	Harney Peak granite	Redden et al. 1990	Magmatic age
40.6833	-105.8	high	1720	± 8	82-17	N Front Range CO	zircon TIMS	Quartz monzonite-Rawah batholith	Premo & VanSchmus 1989	Magmatic age
47.0034	-109.128	low	1731	± 5	MX-08	Grassrange intrusions MT	zircon LA-ICP-MS	metagranitoid xenolith	Gifford et al. 2014	Magmatic age
42.62	-96.7	medium	1733	± 2	SDUN-01	SDGS Elk Point well SD	zircon TIMS	metagabbro	VanSchmus et al. 2007
40.3333	-106.733	high	1735	± 8	82-11	Park Range CO	zircon TIMS	Quartz diorite-Rabbit Ears Pass	Premo & VanSchmus 1989	Magmatic age
47.0034	-109.128	low	1736	± 9	MX-18	Grassrange intrusions MT	zircon LA-ICP-MS	metagranitoid xenolith	Gifford et al. 2014	Magmatic age
42.411	-104.584	medium	1741	± 3	HU-92-16	Hartville Uplift WY	zircon TIMS	Twin Hills diorite gneiss	Krugh 1997	Magmatic age
41.035	-106.862	high	1744	± 14	81-24	Sierra Madre WY	zircon TIMS	Sierra Madre granite N Hog Park	Premo & VanSchmus 1989	Magmatic age
41.1333	-106.25	high	1744	±18	82-22	Medicine Bow Mountains WY	zircon TIMS	Keystone red granite	Premo & VanSchmus 1989	Magmatic age
40.5167	-106.733	high	1746	± 6	82-12a	Park Range CO	zircon TIMS	Granite-Buffalo Pass	Premo & VanSchmus 1989	Magmatic age
41.1183	-106.9	high	1749	± 8	82-34	Sierra Madre WY	zircon TIMS	Sierra Madre granite W Hog Park	Premo & VanSchmus 1989	Magmatic age
48.5	-112	very low	1757	± 6	DRA-93-20	Xenolith MT	zircon LA-ICP-MS	quartzofeldspathic granulite	Gifford et al. 2020	Magmatic age
42.78	-96.95	medium	1762	± 28	SDCL-01	SDGS Vermillion well SD	zircon TIMS	granite	VanSchmus et al. 2007
41.1433	-106.877	high	1763	± 6	82-06	Sierra Madre WY	zircon TIMS	Sierra Madre granite Dead Horse Pk	Premo & VanSchmus 1989	Magmatic age
42.2306	-105.34	high	1763	± 7	PRW-211	Laramie Mountains WY	zircon TIMS	Deformed mafic dike in Laramie Peak shear zone	Resor et al. 1996	Metamorphic age
40.5167	-106.733	high	1765	± 8	82-12b	Park Range CO	zircon TIMS	Pegmatite Buffalo Pass	Premo & VanSchmus 1989	Magmatic age
41.175	-106.275	high	1777	±4	82-20	Medicine Bow Mountains WY	zircon TIMS	Granite-Horse Creek	Premo & VanSchmus 1989	Magmatic age
45.4434	-94.4836	high	1777	± 1.49	ECMB4	East-central Minnesota batholith MT	zircon ID TIMS	Richmond granite	Swanson-Hysell et al. 2021	Magmatic age
41.0256	-106.656	high	1777	± 11	SM357	Sierra Madre WY	zircon SHRIMP-RG	Biotite granodiorite gneiss	Jones et al. 2010	Magmatic age
41.1033	-107.02	high	1779	± 5	81-22	Sierra Madre WY	zircon TIMS	Encampment R granodiorite	Premo & VanSchmus 1989	Magmatic age
45.534	-94.2319	high	1779	± 2.3	ECMB6	East-central Minnesota batholith MT	zircon ID TIMS	St Cloud granite	Swanson-Hysell et al. 2021	Magmatic age
41.1017	-107.053	high	1780	± 6	81-06	Sierra Madre WY	zircon TIMS	Rhyolite porphyry-Fletcher Park	Premo & VanSchmus 1989	Magmatic age
41.1217	-106.888	high	1781	± 8	82-13	Sierra Madre WY	zircon SHRIMP-RG	Green Mt formation	Jones et al. 2010	Magmatic age-reanalyzed Premo & VanSchmus sample
41.1667	-106.25	high	1781	±7	82-21	Medicine Bow Mountains WY	zircon TIMS	Keystone quartz diorite	Premo & VanSchmus 1989	Magmatic age
45.5348	-94.2581	high	1781	± 0.45	QP1	East-central Minnesota batholith MT	zircon ID TIMS	qz-fsp porphyry dike	Swanson-Hysell et al. 2021	Magmatic age
48.8508	-104.129	high	1781	± 16	MT-1	Amerada #1 A. Johnson well MT	zircon TIMS	mafic granulite and charnockite	Sims et al. 2001 quoting unpublished USGS data
41.0113	-106.683	high	1782	± 7	SM073r	Sierra Madre WY	zircon SHRIMP-RG	Metagabbro	Jones et al. 2010	Magmatic age
47.9353	-108.617	high	1783	± 7	MLR-04	Little Rocky Mountains MT	zircon LA-ICP-MS	Garnet biotite quartzofeldspathic augen gneiss	Gifford et al. 2018	One grain-interpreted as metamorphic age. Three others yielded dates of ~2.55-2.6 Ga
41.0153	-106.508	high	1784	± 5	SM294-WQM	Sierra Madre WY	zircon SHRIMP-RG	White quartz monzonite cores	Jones et al. 2013	Magmatic age of xenocrysts
44.01	-96.65	medium	1790	± 13	SDMO-01	Kerr-McGee Mineral test well SD	zircon TIMS	Microgranite	VanSchmus et al. 2007
45.0009	-113.356	high	1799	± 7	BDC-6	Tendoy Mountains MT	zircon SHRIMP-RG	quartzofeldspathic rock	Mueller et al. 2016	Magmatic age
48.5	-112	very low	1813	± 5	DRA-93-01	Xenolith MT	zircon LA-ICP-MS	garnet-cpx granulite	Gifford et al. 2020	Magmatic age
46.8718	-111.978	high	1817	± 11	LB0168	Little Belt Mountains MT	zircon SHRIMP-RG	Sheep Creek amphibolite	Foster et al. 2006	Magmatic age
44.04	-96.74	medium	1828	± 8	SDMO-02	Kerr-McGee Mineral test well SD	zircon TIMS	metarhyolite	VanSchmus et al. 2007
46.912	-110.652	low	1851	± 11	N-1	Little Belt Mountains MT	zircon SHRIMP	Red feldspar gneiss	Mueller et al. 2002	Magmatic age
45.6703	-112.951	high	1863	± 13	P982	Pioneer Mountains MT	zircon SHRIMP-RG	Pioneer Mt diorite gneiss	Foster et al. 2006	Magmatic age
46.912	-110.652	low	1864	± 5	N-3	Little Belt Mountains MT	zircon SHRIMP	Pinto diorite	Mueller et al. 2002	Magmatic age
46.912	-110.652	low	1867	± 6	N-2	Little Belt Mountains MT	zircon SHRIMP	Gray gneiss	Mueller et al. 2002	Magmatic age
47.928	-108.547	high	1867	± 72	MLR-15	Little Rocky Mountains MT	zircon LA-ICP-MS	Biotite-amphibole quartzofeldspathic gneiss	Gifford et al. 2018	One grain-interpreted as metamorphic age
43.69	-98.1	medium	1871	± 16	SDDA-01	SDGS #1 Everett Wilson well SD	zircon TIMS	granodiorite	VanSchmus et al. 2007
45.994	-113.339	high	1890	±10	BCD-4	Tendoy Mountains MT	zircon SHRIMP-RG	quartzofeldspathic rock	Mueller et al. 2016	Magmatic age
45.4789	-112.474	high	1892	± 20	DF99-102	Biltmore anticline MT	zircon SHRIMP-RG	Biltmore anticline gneiss	Foster et al. 2006	Magmatic age
44.2497	-106.958	high	1899	± 5	BH10	Bighorn Mountains WY	baddeleyite TIMS	Sourdough dike	Kilian et al. 2016	Magmatic age
45.9971	-113.333	high	1904	± 13	BCD-2	Tendoy Mountains MT	zircon SHRIMP-RG	Metavolcanic/volcaniclastic schist	Mueller et al. 2016	Magmatic age
47.8562	-105.637	high	1908	± 3	MT-3	Shell Northern Pacific 32-33B well MT	zircon TIMS	amphibolite with granitic veins	Sims et al. 2001 quoting unpublished USGS data
41.16	-106.858	high	2092	± 9	82-30	Sierra Madre WY	zircon TIMS	Metagabbro-post-Deep Lake Gp	Premo & VanSchmus 1989	Magmatic age
42.2431	-107.107	high	2113	± 15	FM-3	Ferris Mountains WY	zircon TIMS	Bear Mt mafic dike	Bowers and Chamberlain 2006	Magmatic age based on 2-point chord
44.2372	-106.932	high	2154	± 2	BNB-09-WY-204	Bighorn Mountains WY	baddeleyite TIMS	Rabbit Creek diabase dike	Kilian et al. 2015	Magmatic age
44.3459	-106.895	high	2156	± 3	BNB-09-WY-202b	Bighorn Mountains WY	baddeleyite TIMS	French Creek diabase dike	Kilian et al. 2015	Magmatic age
44.0697	-107	high	2158	± 4	BNB-09-WY-207b	Bighorn Mountains WY	baddeleyite TIMS	Dike C near Hazelton Peak	Kilian et al. 2015	Magmatic age
44.1545	-107.056	high	2164	± 7	BNB-09-WY-208a	Bighorn Mountains WY	baddeleyite TIMS	Powder River Pass dike	Kilian et al. 2015	Magmatic age
42.4154	-108.515	high	2164	± 7	BNB-09-WY-210b	South Pass Wind River Range WY	baddeleyite TIMS	Wind River-South Pass dike	Kilian et al. 2015	Magmatic age
42.551	-104.506	medium	2406	± 5	HU-91-10	Hartville Uplift	zircon TIMS	Rawhide Buttes grey granite gneiss	Krugh 1997	Magmatic age
47.9353	-108.617	high	2416	± 9	MLR-06	Little Rocky Mountains MT	zircon LA-ICP-MS	Biotite quartzofeldspathic gneiss	Gifford et al. 2018	Magmatic age
47.9353	-108.617	high	2420	± 12	MLR-01	Little Rocky Mountains MT	zircon LA-ICP-MS	Garnet-two-mica- quartzofeldspathic mylonitic gneiss	Gifford et al. 2018	Magmatic age
45.1149	-112.462	high	2420	± 8	RR-05-09	Ruby Range MT	zircon ICP-MS	Garnet leucogranite gneiss	Alcock & Mueller 2012	Magmatic age
42.2733	-106.732	high	2429	± 4	82-05	Medicine Bow Mts WY	zircon TIMS	Baggot Rocks granite	Premo & VanSchmus 1989	Magmatic age
40.9369	-111.806	high	2448	±9	FCC10	Farmington Canyon Complex UT	zircon SHRIMP	Little Willow Complex quartzofeldspathic gneiss	Mueller et al. 2011	Magmatic age
45.8368	-111.906	high	2450		BHT-2	Tendoy Mountains MT	zircon SHRIMP	Medicine Lodge gneiss	Mueller et al. 2016	Approximate magmatic age
41.137	-111.856	high	2455	± 22	FCC12	Farmington Canyon Complex UT	zircon SHRIMP	Migmatitic gneiss-pink	Mueller et al. 2011	Maximum magmatic age
47.0034	-109.128	low	2456	± 160	MX-11	Grassrange intrusions MT	zircon LA-ICP-MS	metagranitoid xenolith	Gifford et al. 2014	Magmatic age; additional zircon growth at 1.82 Ga
41.137	-111.856	high	2458	± 12	FCC11	Farmington Canyon Complex UT	zircon SHRIMP	Migmatitic gneiss-gray	Mueller et al. 2011	Maximum magmatic age
44.2033	-103.531	medium	2480	± 6	JAM 14	Black Hills SD	zircon SHRIMP	Blue Draw metagabbro (dioritic pegmatite)	Dahl et al. 2006	Magmatic age
47.0034	-109.128	low	2519	± 15	MX-09	Grassrange intrusions MT	zircon LA-ICP-MS	metagranitoid xenolith	Gifford et al. 2014	Magmatic age; additional zircon growth at 1.77 Ga
42.1757	-106.878	high	2522	± 5	99SEM2	Seminoe Mts WY	zircon TIMS	Kortes granite	Wall 2004	2-pt chord represents either metamorphism or magmatic age; 2630 Ma date from additional three fractions (see separate entry) represents magmatic age or inheritance
47.0034	-109.128	low	2524	± 25	MX-06	Grassrange intrusions MT	zircon LA-ICP-MS	metagranitoid xenolith	Gifford et al. 2014	Magmatic age; additional zircon growth at 1.84 Ga
47.0034	-109.128	low	2528	± 7	MX-10	Grassrange intrusions MT	zircon LA-ICP-MS	metagranitoid xenolith	Gifford et al. 2014	Magmatic age; additional zircon growth at 1.83 Ga
43.755	-110.916	medium	2547	± 3	MO-1	Teton Range WY	zircon TIMS	Mount Owen granite	Zartman & Reed 1998	Magmatic age
44.2	-103.5	low	2559	± 6	EG-16 & JAM-2A	Black Hills SD	zircon SHRIMP	Little Elk granite	McCombs et al. 2004	Magmatic age
45.4	-110.5	low	2564	± 13	AGS	North Snowy Block-Beartooth Mts MT	zircon TIMS	Augen Gneiss sill	Mogk et al. 1988	Magmatic age
43.87	-103.75	low	2595	± 11	BM-20	Black Hills SD	zircon SHRIMP	Bear Mountain granite	McCombs et al. 2004	Magmatic age
45.25	-111.5	low	2596	± 6	MR-21	Southern Madison Range MT	zircon TIMS	Granodioritic gneiss	Mueller et al. 1993	Magmatic age
42.666	-108.006	medium	2602		ES89-1	Granite Mountains WY	titanite TIMS	West Long Ck orthogneiss	Langstaff 1995	Deformation age based on 2 analyses; 1 concordant
42.655	-107.894	medium	2606		TM89-42	Granite Mountains WY	titanite TIMS	Tin Cup Mt orthogneiss	Langstaff 1995	Deformation age based on 1 concordant analysis
41.941	-105.413	medium	2610	± 9	LR-2	Laramie Mountains WY	zircon TIMS	Gibbs Canyon granitic gneiss	Snyder et al. 1998	Magmatic age
42.5245	-107.769	high	2615	± 2	02SM3	Granite Mountains WY	zircon TIMS	Stampede Meadows porphyritic biotite granite	Wall 2004	Magmatic age-based on single <1% disconcordant analysis
43.6	-110.833	high	2615	to 2611	98T12	Teton Range WY	titanite TIMS	Rendezvous gabbro	Frost et al. 2018	Age of metamorphic titanite growth
42.4743	-108.793	high	2615	± 2	MP164	South Pass-Wind River Range WY	titanite TIMS	Carissa Mine alteration zone	C. Frost et al. 2006	Age of deformation or fluid flow
42.5	-108.7	low	2617	± 2	95SP3	South Pass-Wind River Range WY	titanite TIMS	Miners Delight metadacite	C. Frost et al. 2006	Age of deformation or fluid flow
43.4665	-109.819	medium	2619	± 2	WR90-2	Wind River Range WY	zircon TIMS	Union Pk granodiorite dike	Frost et al. 1998	Magmatic age
41.9159	-105.277	medium	2619	± 1	93RMA-20	Laramie Mountains WY	zircon TIMS	Squaw Mt. granite	Verts et al. 1996	Magmatic age
42.9024	-109.099	medium	2619	± 3	BEP4	Wind River Range WY	zircon TIMS	Bears Ears granite	Wall 2004	Magmatic age-based on single 3% disconcordant analysis
42.4708	-106.796	high	2622	± 2	Fremont-99	Granite Mountains WY	zircon TIMS	Fremont Canyon granite	Wall 2004	Magmatic age-based on single concordant analysis
43.5962	-110.857	high	2622	± 5	07T23	Teton Range WY	titanite TIMS	Garnet hb dike cross-cutting Rendezvous Gabbro	Frost et al. 2018	Age of metamorphic titanite growth
42.8545	-109.068	medium	2623	± 11	02BEP2	Wind River Range WY	zircon TIMS	Bears Ears granite	Wall 2004	Magmatic age
42.5155	-107.795	high	2623	± 4	11SMG1	Granite Mountains WY	zircon SHRIMP	Wyoming batholith Mackintosh area	Bagdonas et al. 2016	Magmatic age
43.9108	-110.832	high	2623	± 3	04T16	Teton Range WY	titanite TIMS	Moose Basin boudinaged mafic dike	Frost et al. 2018	Age of metamorphic titanite growth
42.5	-109.2	low	2624	± 2	92210 F2	Wind River Range WY	zircon TIMS	Prospect Mt. granite	Sutherland & Luhr 2011	Magmatic age
42.5146	-107.795	high	2624	± 4	11SMG2	Granite Mountains WY	zircon SHRIMP	Wyoming batholith Mackintosh area	Bagdonas et al. 2016	Magmatic age-based on single -1% discordant analysis
42.4354	-108.978	high	2627	± 1	93SP7	South Pass-Wind River Range WY	zircon TIMS	Sweetwater pluton	C. Frost et al. 2006	Magmatic age
42.5316	-107.561	high	2627	± 3	10LD2	Granite Mountains WY	zircon SHRIMP	Wyoming batholith at Lankin Dome	Bagdonas et al 2016	Magmatic age-based on 1 concordant analysis
43.5962	-110.857	high	2627	to 2617	07T22	Teton Range WY	titanite TIMS	Rendezvous gabbro	Frost et al. 2018	Age of metamorphic titanite growth
42.8902	-109.649	medium	2629	± 3	92FL-A	Wind River Range WY	zircon TIMS	Louis Lake charnockite-Boulder Canyon	Frost et al. 1998	Magmatic age
42.859	-109.565	high	2630	± 2	92SC-A	Wind River Range WY	zircon TIMS	Louis Lake batholith-Boulder Canyon	Frost et al. 1998	Magmatic age
42.1757	-106.878	high	2630	± 20	99SEM2	Seminoe Mts WY	zircon TIMS	Kortes Granite	Wall 2004	3 pt chord through older fractions represents either magmatic age or inheritance; two younger fractions (2522 Ma-see separate entry) represent metamorphism or magmatic age
42.7179	-107.324	medium	2632	± 7	99BG6c	Granite Mountains WY	titanite TIMS	Mylonitic metabasalt-McDougall Gulch shear zone	C. Frost et al. 2006	Age of deformation or fluid flow
42.9361	-109.479	high	2633	± 6	DM18	Wind River Range WY	monazite TIMS	Medina Mt garnet-biotite-plagioclase-cordierite gneiss	Keane et al. 2006	Metamorphic age
42.4748	-108.795	high	2635	± 2	MP164	South Pass-Wind River Range WY	titanite TIMS	Carissa Mine alteration zone	C. Frost et al. 2006	Minimum age of deformation
41.92	-105.33	low	2637	± 10		Laramie Mountains WY	zircon TIMS	Elmers Rock rhyolite	Snyder et al. 1988	Magmatic age
41.3165	-107.252	medium	2638	± 2	03SM13	Sierra Madre WY	zircon TIMS	quartzofeldspathic oog basement	Souders & Frost 2006	Magmatic age-based on most concordant analysis
43.049	-109.661	high	2638	± 7	09BL2	Wind River Range WY	zircon SHRIMP	Bridger batholith granite gneiss	Frost et al. 2018	Magmatic age
43.049	-109.661	high	2638	± 7	09BL2	Wind River Range WY	zircon SHRIMP	Bridger batholith granite gneiss	Frost et al. 2018	Magmatic age
42.683	-107.979	medium	2640	± 20	TCM2	Granite Mountains WY	zircon TIMS	Granite of Long Ck Mt	Ludwig & Stuckless 1978	Magmatic age
42.5924	-108.843	medium	2642	± 13	WYLL-2 & WYWR-4	Wind River Range WY	zircon TIMS	Louis Lake batholith	Naylor et al. 1970	Magmatic age
49.8	-113	very low	2643	± 3	PCA Calstan Parkland	Drillcore-Alberta	zircon LA-ICP-MS	hornblende biotite plagioclase mafic gneiss	Gifford et al. 2020	Magmatic age
42.7179	-107.324	medium	2645	± 6	99BG6c	Granite Mountains WY	titanite TIMS	Mylonitic metabasalt-McDougall Gulch shear zone	C. Frost et al. 2006	Deformation age
42.6324	-107.532	high	2649	± 1	01SWP11	Granite Mountains WY	zircon TIMS	West Sage Hen Rocks sheared amphibolite	Grace et al. 2006	Deformation age
42.666	-108.006	medium	2650	± 17	ES89-1	Granite Mountains WY	zircon TIMS	West Long Creek orthogneiss	Langstaff 1995	Magmatic age
43.3383	-109.749	high	2657	± 2	SW121	Wind River Range WY	monazite TIMS	Crescent Lake metapelite	Keane et al. 2006	Metamorphic age
43.9108	-110.832	high	2668	± 4	04T16	Teton Range WY	zircon TIMS	Moose Basin boudinaged mafic dike	Frost et al. 2018	Magmatic age
42.5193	-108.745	high	2669	± 4	95SP12	South Pass-Wind River Range WY	zircon TIMS	Miners Delight lapilli tuff	C. Frost et al. 2006	Magmatic age
44.855	-111.393	low	2670	± 3	MR-28	Southern Madison Range MT	zircon TIMS	Meta-andesite-Cherry Ck Meta. Suite	Mueller et al. 1993	Magmatic age
42.955	-109.625	medium	2670	± 13	BW 33	Wind River Range WY	zircon TIMS	Bridger batholith hornblende granite gneiss	Aleinikoff et al. 1989	Magmatic age
43.9108	-110.832	high	2673	± 2	98T17	Teton Range WY	zircon TIMS	Webb Canyon gneiss	B. Frost et al. 2006	Magmatic age
43.8961	-110.824	high	2674	± 5	06T12	Teton Range WY	zircon SHRIMP	Webb Canyon gneiss	Frost et al. 2016	Magmatic age
43.9147	-110.76	high	2675	± 6	07T16	Teton Range WY	zircon SHRIMP	Bitch Creek gneiss	Frost et al. 2016	Magmatic age
43.9351	-110.885	high	2677	± 3	06T39	Teton Range WY	zircon SHRIMP	Webb Canyon gneiss	Frost et al. 2016	Magmatic age
43.919	-110.723	high	2677	± 6	07T30	Teton Range WY	zircon SHRIMP	Webb Canyon gneiss	Frost et al. 2016	Magmatic age
41.3062	-107.222	high	2679	± 2	03SM6	Sierra Madre WY	zircon TIMS	metadacite Silver Lake metavolcanics	Souders & Frost 2006	Magmatic age-based on most concordant analysis
43.9064	-110.875	high	2679	± 4	06T35	Teton Range WY	zircon SHRIMP	Webb Canyon gneiss	Frost et al. 2016	Magmatic age
43.1753	-109.467	medium	2681	± 2	95BOB20	Wind River Range WY	zircon TIMS	Tholeiitic dike	B. Frost et al. 2006	Magmatic age
41.265	-106.923	high	2683	± 6	81-40	Sierra Madre WY	zircon TIMS	Felsic red-pink quartzofeldspathic orthogneiss	Premo & VanSchmus 1989	Magmatic age
43.5633	-108.664	high	2683	± 8	98OC15a	W Owl Creek Mountains WY	baddleyite TIMS	Tholeiitic dike	B. Frost et al. 2006	Magmatic age based on 2 fractions of clear grains
43.9886	-110.738	high	2683	± 3	03T8	Teton Range WY	zircon SHRIMP	Webb Canyon gneiss	Frost et al. 2016	Magmatic age
44.3167	-106.875	medium	2684	± 1	NR-13-6 & NR-13-7	Bighorn Mountains WY	zircon TIMS	Trailside ultramafic complex norite	Lynds et al. 2014	Magmatic age
43.9349	-110.898	high	2684	± 4	06T33	Teton Range WY	zircon SHRIMP	Webb Canyon gneiss	Frost et al. 2016	Magmatic age
43.6	-110.833	medium	2685	± 2	98T12	Teton Range WY	zircon SHRIMP	Rendezvous gabbro	Frost et al. 2018	Magmatic age
43.9108	-110.832	high	2685	± 3	04T17	Teton Range WY	zircon SHRIMP	Bitch Creek gneiss	Frost et al. 2016	Magmatic age
43.8952	-110.804	high	2685	± 5	06T9	Teton Range WY	zircon SHRIMP	Leucosome in layered gneiss	Swapp et al. 2018	Age of zircon growth from partial melts
43.9033	-110.759	high	2686	± 5	07T4	Teton Range WY	zircon SHRIMP	Webb Canyon gneiss	Frost et al. 2016	Magmatic age
42.5899	-107.229	high	2688	± 6	04SWP3	Granite Mountains WY	zircon CA-TIMS	Beulah Belle Lake sheared amphibolite dike	Grace et al. 2006	Magmatic age
41.2458	-107.04	high	2691	± 8	KD94-72	Sierra Madre WY	titanite TIMS	Vulcan Mountain volcanic/volcaniclastic rock	Harper 1997	Metamorphic age
43.5962	-110.857	high	2692	± 3	07T23	Teton Range WY	zircon SHRIMP	Rendezvous gabbro	Frost et al. 2018	Maximum magmatic age
42.1604	-107.006	high	2693	± 3	01SEM8	Seminoe Mts WY	zircon TIMS	Bradley Pk foliated granite	Wall 2004	Intrusive age based on 2-point chord; older fractions interpreted as containing inheritance
43.9167	-110.846	high	2695	± 7	06T16	Teton Range WY	zircon rims SHRIMP	Leucosome in mafic granulite	Swapp et al. 2018	Age of peak metamorphism and partial melting
43.1731	-109.663	medium	2699	± 7	BW50	Wind River Range WY	zircon TIMS	Granulite migmatite marginal to Bridger batholith	Aleinikoff et al. 1989	Metamorphic age
45.42	-110.03	low	2709	± 1	many samples	Beartooth Mountains MT	zircon CA-TIMS	Stillwater Complex	Wall et al. 2018	Magmatic age of youngest rocks including J-M Reef-range 2709-2712 Ma
41.2683	-107.087	high	2710	± 10		Sierra Madre WY	zircon TIMS	Spring Lake granodiorite	Premo & VanSchmus 1989	Magmatic age
44.9987	-112.899	high	2710	± 10	AA-1	Armstead anticline MT	zircon SHRIMP-RG	quartzofeldspathic leucogneiss	Mueller et al. 2016	Magmatic age
41.2444	-107.029	high	2711	± 1	KD94-71	Sierra Madre WY	zircon TIMS	Spring Lake granodiorite	Harper 1997	Magmatic age based on analysis of single grain
42.2514	-107.202	high	2717		FM-2	Ferris Mountains WY	zircon TIMS	Ferris Mts granite porphyry	Bowers & Chamberlain 2006	Intrusive age based on 2-point chord; older fractions interpreted as containing inheritance
42.2094	-107	medium	2718	± 18		Bradley Peak-Seminoe Mts WY	zircon TIMS	Intensely sheared rhyodacite	Houston et al 1993 quoting unpublished date by Goldich	Magmatic age
43.0681	-109.268	high	2718	± 2	91PB7	Wind River Range WY	monazite TIMS	Paradise Basin gar-bi-pl-ksp-sill-cord-q migmatite	Keane et al. 2006	Metamorphic age
42.1073	-105.576	low	2729	± 62	4241	Laramie Mountains WY	zircon TIMS	Sellers Mt. rhyolite	Snyder et al. 1997	Magmatic age
42.554	-107.847	high	2730	± 5	11SM12	Granite Mountains WY	zircon SHRIMP	monzonite gneiss	McLaughlin 2016	Magmatic age
42.7161	-107.314	medium	2731	to 2718	99BG13	Granite Mountains WY	zircon TIMS	Rattlesnake Hills Gp metadacite	C. Frost et al. 2006	Magmatic age
42.2547	-107.168	high	2734	± 2	FM-1	Ferris Mountains WY	zircon TIMS	Turkey Creek oog	Bowers & Chamberlain 2006	Magmatic age
50.6	-109.8	very low	2742	± 3	Imperial Calstan Lake Newell	Drillcore-Alberta	zircon LA-ICP-MS	pegmatitic granodiorite gneiss	Gifford et al. 2020	Magmatic age
45.25	-111.5	low	2751	± 10	MR-5	Southern Madison Range MT	zircon TIMS	Granitic augen gneiss	Mueller et al. 1993	Magmatic age
47.928	-108.547	high	2773	± 9	MLR-15	Little Rocky Mountains MT	zircon LA-ICP-MS	Biotite-amphibole quartzofeldspathic gneiss	Gifford et al. 2018	Magmatic age
47.928	-108.547	high	2779	± 15	LRM-7	Little Rocky Mountains MT	zircon LA-ICP-MS	Fine-grained biotite granite gneiss	Gifford et al. 2018	Magmatic age
44.9472	-109.49	high	2781	± 11	BTR64	Beartooth Mountains WY	zircon TIMS	granodioritic LLMC	Mueller et al. 2010	Magmatic age; zircon SHRIMP age 2789 ± 11
47.928	-108.547	high	2781	± 23	LRM-3	Little Rocky Mountains MT	zircon LA-ICP-MS	Biotite-hornblende gneiss of tonalitic to granodioritic composition	Gifford et al. 2018	Magmatic age
47.928	-108.547	high	2782	± 6	MLR-18	Little Rocky Mountains MT	zircon LA-ICP-MS	Deformed fine-grained biotite quartzofeldspathic metavolcanic	Gifford et al. 2018	Magmatic age
44.9494	-109.489	high	2783	± 5	BTR52	Beartooth Mountains WY	zircon TIMS	dioritic LLMC	Mueller et al. 2010	Magmatic age
47.928	-108.547	high	2784	± 10	MLR-13	Little Rocky Mountains MT	zircon LA-ICP-MS	Staurolite chloritoid quartzofeldspathic gneiss	Gifford et al. 2018	Magmatic age
44.9472	-109.49	high	2791	± 2	BTR27	Beartooth Mountains WY	zircon TIMS	dioritic LLMC	Mueller et al. 2010	Magmatic age
45.0299	-109.408	high	2792	± 8	HRR70	Beartooth Mountains MT	zircon SHRIMP	granodioritic LLMC	Mueller et al. 2010	Magmatic age
47.928	-108.547	high	2792	± 5	MLR-19	Little Rocky Mountains MT	zircon LA-ICP-MS	Biotite quartzofeldspathic gneiss	Gifford et al. 2018	Magmatic age
44.9366	-109.525	high	2793	± 2	BTR57	Beartooth Mountains WY	zircon TIMS	dioritic LLMC	Mueller et al. 2010	Magmatic age; zircon SHRIMP age 2800 ± 5
47.928	-108.547	high	2795	± 6	MLR-17	Little Rocky Mountains MT	zircon LA-ICP-MS	Deformed fine-grained biotite quartzofeldspathic metavolcanic	Gifford et al. 2018	Magmatic age
44.9285	-109.631	high	2800	± 10	BTR32	Beartooth Mountains WY	zircon SHRIMP	granodioritic LLMC	Mueller et al. 2010	Magmatic age
43.9147	-110.76	high	2800	± 8	07T16	Teton Range WY	zircon SHRIMP	porphyritic augen gneiss	Frost et al. 2018	Magmatic age
45.38	-109.859	high	2803	± 1	ST11-34	Beartooth Mountains MT	zircon CA-TIMS	Mouat quartz monzonite	Wall et al. 2018	Magmatic age
47.928	-108.547	high	2804	± 10	LRM-5	Little Rocky Mountains MT	zircon LA-ICP-MS	Fine-grained biotite granite gneiss	Gifford et al. 2018	Magmatic age
44.9472	-109.49	high	2805	± 10	BTR62	Beartooth Mountains WY	zircon SHRIMP	granitic LLMC	Mueller et al. 2010	Magmatic age
43.5447	-108.596	high	2807	± 8	98OC8	W Owl Creek Mountains WY	zircon TIMS	Granodiorite gneiss	Kirkwood 2000	Magmatic age
44.9505	-109.482	high	2810	± 14	BTR42	Beartooth Mountains WY	zircon SHRIMP	granitic LLMC	Mueller et al. 2010	Magmatic age
41.7895	-107.275	high	2814	± 2	09RU-1	Rawlins Uplift WY	zircon CA-TIMS	Porphyritic biotite monzogranite	McLaughlin & Fruhwirth 2008	Age of sparse zircon surviving chemical abrasion in undeformed granite
45.0299	-109.408	high	2819	± 7	QC140	Beartooth Mountains MT	zircon SHRIMP	granitic LLMC	Mueller et al. 2010	Magmatic age
45.0491	-109.416	high	2825	± 12	QC147	Beartooth Mountains MT	zircon SHRIMP	granitic LLMC	Mueller et al. 2010	Magmatic age
44.95	-109.48	low	2826	± 15	BTR201	Beartooth Mountains WY	zircon SHRIMP	granitic LLMC	Mueller et al. 2010	Magmatic age; zircon TIMS age 2576 ± 7
45.0299	-109.408	high	2833	± 10	QC141	Beartooth Mountains MT	zircon SHRIMP	granitic LLMC	Mueller et al. 2010	Magmatic age
49.5	-111.5	very low	2836	± 3	DRA-93-26	Xenolith Alberta	zircon LA-ICP-MS	Hornblende biotite tonalite	Gifford et al. 2020	Magmatic age
43.4873	-108.506	high	2837	± 4	98OC2	W Owl Creek Mountains WY	zircon TIMS	Granodiorite gneiss	Kirkwood 2000	Magmatic age
44.6514	-107.431	high1	2842	± 3	96BH4	Bighorn Mountains WY	zircon SHRIMP	Bighorn batholith granodiorite	Frost & Fanning 2006	Magmatic age
43.5011	-108.514	high	2843	± 2	98OC4	W Owl Creek Mountains WY	zircon TIMS	Hornblende tonalite gniess	Kirkwood 2000	Magmatic age
43.5274	-108.557	high	2843	± 6	98OC6	W Owl Creek Mountains WY	zircon TIMS	Biotite tonalite gneiss	Kirkwood 2000	Magmatic age
44.6514	-107.431	high1	2844	± 5	96BH4	Bighorn Mountains WY	titanite SHRIMP	Bighorn batholith granodiorite	Frost & Fanning 2006	Magmatic age
44.6448	-107.503	medium	2845	± 25	#51	Bighorn Mountains WY	zircon & monazite TIMS	Bighorn batholith quartz monzonite	Heimlich & Banks 1968	Magmatic age
42.717	-107.314	medium	2854	± 6	BG91.9 & SR89-51	Granite Mountains WY	zircon TIMS	Barlow Springs Fm. dacite	Langstaff 1995	Magmatic age based on 7 single grains from samples from two different localities: BG91.9 (42.717; -107.314) and SR89-51 (42.61; -107.043)
44.6448	-107.503	high1	2859	± 3	96BH2	Bighorn Mountains WY	zircon SHRIMP	Bighorn batholith granite	Frost & Fanning 2006	Magmatic age
42.6577	-107.387	medium	2864	± 8	00BG10	Granite Mountains WY	zircon TIMS	Barlow Springs group dacite	Fruchey 2002	Magmatic age
45.9861	-105.054	medium	2880		Madison #2	Williston Basin MT	zircon TIMS	Granite from drillhole	Peterman 1981	Magmatic age based on data from two fractions
44.4213	-107.225	high	2883	± 11	7.15.2	Bighorn Mountains WY	zircon LA-ICP-MS	mylonite Geneva Pass area	Malone et al. 2019	Magmatic age
44.4337	-107.253	high	2884	± 13	7.14.1	Bighorn Mountains WY	zircon LA-ICP-MS	migmatite Geneva Pass area	Malone et al. 2019	Magmatic age
44.2782	-107.189	high	2886	± 5	95LH1	Bighorn Mountains WY	zircon SHRIMP	Central gneiss terrain banded gneiss	Frost & Fanning 2006	Magmatic age
48.8484	-101.616	high	2890		ND-7	Shell Osterberg 21-2 well	zircon TIMS	biotite cordierite gneiss	Sims et al. 2001 quoting unpublished USGS data	Magmatic age
44.4186	-107.241	high	2890	± 15	7.16.2	Bighorn Mountains WY	zircon LA-ICP-MS	migmatite Geneva Pass area	Malone et al. 2019	Magmatic age
44.2	-103.5	low	2894	± 6	EG-16	Black Hills SD	zircon SHRIMP	Little Elk granite xenocrystic zircon core	McCombs et al 2004	Age of xenocryst core in 2.56 Ga granite
43.434	-107.297	high	2900		97BNE5	Bighorn Mountains WY	zircon SHRIMP	Southern gneiss terrain banded gneiss	Frost & Fanning 2006	Minimum magmatic age
44.4108	-107.246	high	2904	± 6	7.16.5	Bighorn Mountains WY	zircon LA-ICP-MS	gneiss Geneva Pass area	Malone et al. 2019	Magmatic age
43.4489	-108.169	low	2905	± 25	W 55	Owl Creek Mountains WY	zircon TIMS	Wind River Canyon dacite	Mueller et al. 1985	Magmatic age
44.4192	-107.254	high	2912	± 11	7.16.1b	Bighorn Mountains WY	zircon LA-ICP-MS	tonalite Geneva Pass area	Malone et al. 2019	Magmatic age
44.4177	-107.253	high	2913	± 11	7.16.1a	Bighorn Mountains WY	zircon LA-ICP-MS	tonalite Geneva Pass area	Malone et al. 2019	Magmatic age
44.4309	-107.236	high	2932	± 8	7.17.4	Bighorn Mountains WY	zircon LA-ICP-MS	mylonite Geneva Pass area	Malone et al. 2019	Magmatic age
44.4277	-107.243	high	2935	± 10	7.15.1	Bighorn Mountains WY	zircon LA-ICP-MS	pegmatite Geneva Pass area	Malone et al. 2019	Magmatic age
44.2785	-107.212	high	2937	± 5	95LH4	Bighorn Mountains WY	zircon SHRIMP	Central gneiss terrain banded gneiss	Frost & Fanning 2006	Magmatic age
44.415	-107.255	high	2938	± 6	7.16.3	Bighorn Mountains WY	zircon LA-ICP-MS	granodiorite Geneva Pass area	Malone et al. 2019	Magmatic age
44.4096	-107.257	high	2941	± 19	7.16.4	Bighorn Mountains WY	zircon LA-ICP-MS	granodiorite Geneva Pass area	Malone et al. 2019	Magmatic age
44.4314	-107.227	high	2941	± 5	7.17.2	Bighorn Mountains WY	zircon LA-ICP-MS	mylonite Geneva Pass area	Malone et al. 2019	Magmatic age
44.1072	-107.048	high	2949	± 5	96HP2	Bighorn Mountains WY	zircon SHRIMP	Central gneiss terrain granodiorite dike	Frost & Fanning 2006	Magmatic age
48.8555	-101.511	high	2950		ND-6	Shell Osterberg 22x-1	zircon TIMS	mafic granulite	Sims et al. 2001 quoting unpublished USGS data	Magmatic age
44.1484	-107.079	high	2952	± 4	96PRP1	Bighorn Mountains WY	zircon SHRIMP	Central gneiss terrain diorite sill	Frost & Fanning 2006	Magmatic age
44.2785	-107.212	high	2958	± 13	95LH4	Bighorn Mountains WY	zircon SHRIMP	Central gneiss terrain banded gneiss	Frost & Fanning 2006	Magmatic age
44.2782	-107.189	high	3004	± 17	95LH1	Bighorn Mountains WY	zircon SHRIMP	Central gneiss terrain banded gneiss-greater than 2.9 Ga	Frost & Fanning 2006	Age of xenocryst in 2.89 Ga banded gneiss
47.9353	-108.617	high	3007	± 7	MLR-03	Little Rocky Mountains MT	zircon LA-ICP-MS	Garnet amphibolite	Gifford et al. 2018	Minimum magmatic age
42.6139	-107.024	high	3010	± 1	01SWP5	Granite Mountains WY	zircon TIMS	Black Rock Mt gabbro	Grace et al. 2006	Magmatic age based on analysis of single zircon fragment
42.4912	-108.82	high	3014	± 2	04SP-QF	Wind River Range WY	zircon SHRIMP	Quartzofeldspathic gneiss of gneiss complex	This study	Magmatic age
42.5862	-107.229	high	3078	± 23	03BBL1	Granite Mountains WY	zircon TIMS	Beulah Belle Lake foliated granite	Grace et al. 2006	Magmatic age
43.9167	-110.846	high	3095	± 81	06T16	Teton Range WY	zircon SHRIMP	Leucosome in mafic granulite	Swapp et al. 2018	Age of protolith to leucosome
42.5844	-107.915	high	3170	± 50		Granite Mountains WY	zircon TIMS	Layered gneiss	Fisher & Stacey 1986	Approximate magmatic age
47.9354	-108.562	high	3179	± 9	MLR-08	Little Rocky Mountains MT	zircon LA-ICP-MS	Medium-grained amphibole-biotite quartzofeldspathic gneiss	Gifford et al. 2018	Magmatic age-scatter in data suggest metamorphism ~2.8 Ga
47.9354	-108.562	high	3206	± 32	MLR-09	Little Rocky Mountains MT	zircon LA-ICP-MS	Biotite quartzofeldspathic gneiss	Gifford et al. 2018	Magmatic age-scatter in data suggest metamorphism ~2.8 Ga
45.4	-110.5	low	3244	± 12	BCA	North Snowy Block-Beartooth Mts MT	zircon SHRIMP	Barney Creek Amphibolite	Mueller et al. 1996	Magmatic age
45	-111.5	low	3251	± 6	MR14	Southern Madison Range MT	zircon TIMS	Tonalitic gneiss	Mueller et al. 1993	Southern Madison Range
44.2785	-107.212	high	3253	± 10	95LH4	Bighorn Mountains WY	zircon SHRIMP	Central gneiss terrain banded gneiss	Frost & Fanning 2006	Age of xenocryst core in 2.94 Ga banded gneiss
42.6417	-107.372	high	3258	± 8	00BG5	Granite Mountains WY	zircon TIMS	Sacawee orthogneiss	Fruchey 2002	Magmatic age
49.3	-109	very low	3277	± 6	Home Pacific Knappen	Drillcore-Saskatchewan	zircon LA-ICP-MS	quartzofeldspathic gneiss	Gifford et al. 2020	Magmatic age
42.6562	-107.575	high	3300		2014-0520-LC-B	Granite Mountains WY	zircon CA-TIMS	Quartzite at West Sage Hen	Cola & Sutherland 2014	Approximate intrusive age of metasomatized orthogneiss
42.5922	-107.223	high	3300		04SWP1/04SWP4	Granite Mountains WY	zircon LA-ICP-MS	Quartzite at Beulah Belle area	Grace et al. 2006	Approximate magmatic age of metasomatized orthogneiss
42.6061	-107.765	high	3302	± 5	10SM10	Granite Mountains WY	zircon SHRIMP	Sacawee orthogneiss	Frost et al. 2017	Magmatic age
42.6417	-107.372	high	3304	± 4	00BG5	Granite Mountains WY	zircon SHRIMP	Sacawee orthogneiss	Frost et al. 2017	Magmatic age
42.6678	-107.534	high	3325		20140530WS-A	Granite Mountains WY	zircon CA-TIMS	Antler orthogneiss	Cola & Sutherland 2014	Maximum magmatic age
42.6078	-107.773	high	3325	± 8	11SM7	Granite Mountains WY	zircon SHRIMP	Tonalite layered gneiss	Frost et al. 2017	Magmatic age
42.5551	-107.848	high	3329	± 23	11SM13	Granite Mountains WY	zircon SHRIMP	Gray wispy layered gneiss	Frost et al. 2017	Magmatic age
42.686	-107.437	medium	3370	± 12	BR92-1	Granite Mountains WY	zircon SHRIMP	Older orthogneiss	Langstaff 1995	Magmatic age
42.5824	-107.229	high	3385	± 14	11BBL01	Granite Mountains WY	zircon SHRIMP	Tonalite layered gneiss	Frost et al. 2017	Magmatic age
42.5826	-107.229	high	3394	± 7	11BBL02	Granite Mountains WY	zircon SHRIMP	Tonalite layered gneiss	Frost et al. 2017	Magmatic age
42.6107	-107.023	high	3400		00SR01	Granite Mountains WY	zircon SHRIMP	UC Ranch tonalite layered gneiss	Frost et al. 2017	Approximate magmatic age
42.5902	-107.899	high	3452	± 3	10GR02	Granite Mountains WY	zircon SHRIMP	Biotite trondhjemite layered gneiss	Frost et al. 2017	Magmatic age
45.4	-110.5	low	3490	± 40	NSB-280	North Snowy Block-Beartooth Mts MT	zircon SHRIMP	Trondhjemitic gneiss	Mueller et al. 1996	Magmatic age of protolith
42.6107	-107.023	high	3822	± 4	00SR01	Granite Mountains WY	zircon SHRIMP	UC Ranch tonalite layered gneiss	Frost et al. 2017	Age of xenocrysts in ~3.4 Ga orthogneiss

## Sheet: References
References
Alcock, J., and Muller, P., 2012, A Paleoproterozoic sedimentary basin within the Wyoming craton exposed in the Ruby Range, SW Montana: identified by field relations and geochronology: Northwest Geology, v. 41, p. 47-62.
Aleinikoff, J.N., Williams, I.S., Compston, W., Stuckless, J.S., and Worl, R.G., 1989, Evidence for an early Archean component in the Middle to Late Archean gneisses of the Wind River Range, west-central Wyoming: conventional and ion microprobe U-Pb data: Contributions to Mineralogy and Petrology, v. 101, p. 198-206.
Bagdonas, D.A., Frost, C.D., and Fanning, C.M., 2016, The Neoarchean Wyoming Batholith: a voluminous, homogeneous granite inboard of a continental arc: American Mineralogist, v. 101, p. 1332-1347. http://dx.doi.org/10.2138/am-2015-5512
Bowers, N.E., and Chamberlain, K.R., 2006, Precambrian history of the Eastern Ferris Mountains and Bear Mountain, central Wyoming province: Canadian Journal of Earth Sciences, v. 43, p. 1467-1487.
Cola, E.C., and Sutherland, W.M., 2014, Preliminary geologic map of the McINtosh Meadows 7.5’ quadrangle, Fremont and Natrona Counties, Wyoming: Wyoming State Geological Survey Open File Report 14-2.
Dahl, P.S., Hamilton, M.A., Wooden, J.L., Foland, K.A., Frei, R., McCombs, J.A., Holm, D.K., 2006, 2480 Ma mafic magmatism in the northern Black Hills, South Dakota: a new link connecting Wyoming and Superior cratons: Canadian Journal of Earth Sciences, v. 43, p. 1579-1600.
Fischer, L.B., and Stacey, J.S., 1986, Uranium-lead zircon ages and common lead measurements for the Archean gneisses of the Granite Mountains, Wyoming. In Z.E. Peterman and D.C. Schuable (eds.), Shorter contributions to isotopic research, U.S. Geological Survey Bulletin 1622, p. 13-24.
Foster, D.A., Mueller, P.A., Mogk, D.W., Wooden, J.L., and Vogl, J.J., 2006, Proterozoic evolution of the western margin of the Wyoming craton: implications for the tectonic and magmatic evolution of the northern Rocky Mountains: Canadian Journal of Earth Sciences, v. 43, p. 1601-1619.
Frost, C.D. and Fanning, C.M., 2006, Archean geochronological framework of the Bighorn Mountains, Wyoming: Canadian Journal of Earth Sciences, v. 43, p. 1399-1418.
Frost, C.D., Frost, B.R., Chamberlain, K.R., and Hulsebosch, T.P., 1998, The Late Archean history of the Wyoming province as recorded by granite plutonism in the Wind River Range, Wyoming: Precambrian Research, v. 89, p. 145-173.
Frost, B.R., Frost, C.D., Cornia, M., Chamberlain, K.R, Kirkwood, R., 2006, The Teton-Wind River domain: a 2.68-2.67 Ga active margin in the western Wyoming province: Canadian Journal of Earth Sciences, v. 43, p. 1489-1510.
Frost, C.D., Fruchey, B.L., Chamberlain, K.R., Frost, B.R., 2006, Archean crustal growth by lateral accretion of juvenile supracrustal belts in the south-central Wyoming province: Canadian Journal of Earth Sciences, v. 43, p. 1533-1555.
Frost, C.D., Swapp, S.M., Frost, B.R., Finley-Blasi, L., and Fitz-Gerald, D.B., 2016, Leucogranites of the Teton Range, Wyoming: a record of Archean collisional orogeny: Geochimica et Cosmochimica Acta, v. 185, p. 528-549. doi:10.1016/j.gca.2015.12.015.
Frost, C. D., McLaughlin, J.F., Frost, B.R., Fanning, C.M., Swapp, S.M., Kruckenberg, S.C., Gonzalez, J., 2017, Hadean origins of Paleoarchean continental crust in the central Wyoming Province: Geological Society of America Bulletin, v. 129, p. 259-280.
Frost, B.R., Swapp, S.M., Frost, C.D., Bagdonas, D.A., and Chamberlain, K.R., 2018, Neoarchean tectonic history of the Teton Range: record of accretion against the present-day western margin of the Wyoming Province: Geosphere, v. 14, 23 p., doi:10.1130/GES01559.1
Fruchey, B.L., 2002, Archean supracrustal sequences of contrasting origin: the Archean history of the Barlow Gap area, northern Granite Mountains, Wyoming: M.S. thesis, University of Wyoming, Laramie. 178 p.
Gifford, J.N., Mueller, P.A., Foster, D.A., Mogk, D.W., 2014, Precambrian crustal evolution in the Great Falls tectonic zone: insights from xenoliths from the Montana Alkali Province: Journal of Geology, v. 122, p. 531-548.
Gifford, J.N., Mueller, P.A., Foster, D.A., Mogk, D.W., 2018, Extending the realm of Archean crust in the Great Falls tectonic zone: evidence from the Little Rocky Mountains, Montana: Precambrian Research, v. 315, p. 264-281.
Gifford, J.N., Malone, S.J., and Mueller, P.A., 2020, The Medicine Hat Block and the Early Paleoproterozoic assembly of western Laurentia: Geosciences, v. 10, p. 271, doi:10.3390/geosciences10070271
Grace, R.L.B., Chamberlain, K.R., Frost, B.R., and Frost, C.D., 2006, Tectonic histories of the Paleo- to Mesoarchean Sacawee Block and Neoarchean Oregon Trail structural belt of the south-central Wyoming province: Canadian Journal of Earth Sciences, v. 43, p. 1445-1466.
Harper, K.M., 1997, U-Pb age constraints on the timing and duration of Proterozoic and Archean metamorphism along the southern margin of teh Archean Wyoming craton: PhD thesis, University of Wyoming, Laramie WY.
Heimlich, R.A., and Banks, P.O., 1968, Radiometric age determinations, Bighorn Mountains, Wyoming: American Journal of Science, v. 266, p. 180-192.
Houston, R. S., Erslev, E. A., Frost, C. D., Karlstrom, K. E., Page, N. J., Zientek, M. L., Reed, Jr., J. C., Snyder, G. L., Worl, R. G., Bryant, B., Reynolds, M. W., Peterman, Z. E., 1993, The Wyoming Province. In Reed, J.C., Jr., Bickford, M.E., Houston, R.S., Link, P.K., Rankin, D.W., Sims, P.K., and Van Schmus, W.R., eds., Precambrian: Conterminous U.S.: Boulder, Colorado, Geological Society …
Jones, D.S., Snoke, A.W., Premo, W.R., Chamberlain, K.R., 2010, New models for Paleoproterozoic orogenesis in the Cheyenne belt region: evidence from the geology and U-Pb geochronology of the Big Creek gneiss, southeastern Wyoming: Geological Society of America Bulletin, v. 122, p. 1877-1898.
Jones, D.S., Barnes, C.G., Premo, W.R., Snoke, A.W., 2013, Reactivation of the Archean -Proterozoic suture along the southern margin of Laurentia during the Mazatzal orogeny: petrogenesis and tectonic implications of ca. 1.63 Ga granite in southeastern Wyoming: Geological Society of America Bulletin, v. 125, p. 164-183.
Keane, S.D., Hall, C.M., Essene, E.J., Cosca, M.A., DeWolf, C.P., and Halliday, A.N., 2006, Isotopic constraints on the thermal history of the Wind River Range, Wyoming: implications for Archean metamorphism: Canadian Journal of Earth Sciences, v. 43, p. 1511-1532.
Kilian, T.M., Bleeker, W., Chamberlain, K.R., Evans, D.A.D., and Cousens, B., 2015, Paleomagnetism, geochronology and geochemistry of the Palaeoproterozoic Rabbit Creek and Powder River dyke swarms: implications for Wyoming in supercraton Superia. In Li, Z., Evans, D.A.D., and Murphy, J.B. (eds.), Supercontinent Cycles through Earth History. Geological Society of London Special Publications, v. 4…
Kilian, T.M., Chamberlain, K.R., Evans, D.A.D., Bleeker, W., and Cousens, B.L., 2016, Wyoming on the run--toward final Paleoproterozoic assembly of Laurentia: Geology, v. 44, p. 863-866.
Kirkwood, R., 2000, Geology, geochronology and economic potential of the Archean rocks in the western Owl Creek Mountains, Wyoming: M.S. thesis, University of Wyoming, Laramie, Wyoming.
Krugh, K.A., 1997, U-Pb thermochronologic constraints on the Early Proterozoic tectonic evolution of the Hartville Uplift, southeast Wyoming: M.S. thesis, University of Wyoming, Laramie, Wyoming.
Langstaff, G.D., 1995, Archean geology of the Granite Mountains, Wyoming: Ph.D. dissertation, Colorado School of Mines, Golden, Colorado.
Ludwig, K.R., and Stuckless, J.S., 1978, Uranium-lead isotope systematics and apparent ages of zircons and other minerals in Precambrian granitic rocks, Granite Mountains, Wyoming: Contributions to Mineralogy and Petrology, v. 65, p. 243-254.
Lynds, Campbell-Stone, Toner, 2014, Preliminary geologic map of the North Ridge quadrangle, Johnson County, Wyoming: Wyoming State Geological Survey Publication OFR14-3.
Malone, J., Gifford, J., Arkle, J., Malone, D.H., Craddock, J.P., and Wolf, M.B., 2019, Geochronology of the southern margin of the Bighorn batholith, Wyoming: The Mountain Geologist, v. 56, p. 267-294.
McCombs, J.A., Dahl, P.S., and Hamilton, M.A., 2004, U-Pb ages of Neoarchean granitoids from the Black Hills, South Dakota, USA: implications for crustal evolution in the Archean Wyoming province: Precambrian Research, v. 130, p. 161-184.
McLaughlin, J.F., 2016, Evolution of the Paleo- and Mesoarchean gneiss of the central Wyoming Province in the western Granite Mountains of Wyoming: PhD Thesis, University of Wyoming, Laramie, Wyoming.
McLaughlin, J.F., and Fruhwirth, J., 2008, Preliminary geologic map of the Rawlins 30' x 60' quadrangle: Wyoming State Geological Survey Publication OFR 08-4.
Mogk, D.W, Mueller, P.A., and Wooden, J.L., 1988, Archean tectonics of the North Snowy Block, Beartooth Mountains, Montana: Journal of Geology, v. 96, p. 125-141.
Mueller, P.A., Peterman, Z.E., and Granath, J.W., 1985, A bimodal Archean volcanic series, Owl Creek Mountains, Wyoming: Journal of Geology, v. 93, p. 701-712.
Mueller, P.A., Shuster, R., Wooden, J., Erslev, E., Bowes, D., 1993, Age and composition of Archean crystalline rocks from the southern Madison Range: implications for crustal evolution in the Wyoming craton: Geological Society of America Bulletin, v. 105,p. 437-446.
Mueller, P.A., Wooden, J.J., Mogk., D.W., Nutman, A.P., and Williams, I.S., 1996, Extended history of a 3.5 Ga trondhjemitic gneiss, Wyoming Province, USA: evidence from U-Pb systematics in zircon: Precambrian Research, v. 78, p. 41-52.
Mueller, P.A., Heatherington, A.L., Kelly, D.M., Wooden, J.L., and Mogk, D.W., 2002, Paleoproterozoic crust within the Great Falls tectonic zone: implications for the assembly of southern Laurentia: Geology, v. 30, p. 127-130.
Mueller, P.A., Wooden, J.L., Mogk, D.W., Henry, D.J., and Bowes, D.R., 2010, Rapid growth of an Archean continent by arc magmatism: Precambrian Research, v. 183, p. 70-88.
Mueller, P.A., Wooden, J.L., Mogk., D.W., and Foster, D.A., 2011, Paleoproterozoic evolution of the Farmington zone: implications for terrane accretion in southwestern Laurentia: Lithosphere, v. 3, p. 401-408.
Mueller, P., Mogk, D., Wooden, J., Spake, D., 2016, U-Pb ages of zircons from the Lower Belt Supergroup and proximal crystalline basement: implications for the early evolution of the Belt Basin. In MacLean, J.S., and Sears, J.W., eds., Belt Basin. Geological Society of America Special Paper 522, p. 283-303.
Naylor, R.S., Steiger, R.H., and Wasserburg, G.J., 1970, U-Th-Pb and Rb-Sr systematics in 2700 x 10^6-year old plutons from the southern Wind River Range, Wyoming: Geochimica et Cosmochimica Acta, v. 34, p. 1133-1159.
Nelson, S.T., Hart, G.L., and Frost, C.D., 2011, A reassessment of Mojavia and a new Cheyenne Belt alignment in the eastern Great Basin: Geosphere, v. 7, p. 513-527.
Peterman, Z.E., 1981, Dating of Archean basement in northeastern Wyoming and southern Montana: Geological Society of America Bulletin part 1, v. 92, p. 139-146.
Premo, W.R., and Van Schmus, W.R., 1989, Zircon geochronology of Precambrian rocks in southeastern Wyoming and northern Colorado: Geological Society of America Special Paper 235, p. 13-32.
Redden, J.A., Peterman, Z.E., Zartman, R.E., and DeWitt, E., 1990, U-Th-Pb geochronology and prelminary interpretation of Precambrian tectonic events in the Black Hills, South Dakota. In Lewry, J.F., and Stauffer, M.R., eds., The Early Proterozoic Trans-Hudson Orogen of North America. Geological Association of Canada Special Paper 37, p. 229-251.
Resor, P.G., Chamberlain, K.R., Frost, C.D., Snoke, A.W., Frost B.R., 1996, Direct dating of deformation: U-Pb age of syndeformational sphene growth in the Proterozoic Laramie Peak shar zone: Geology, v. 24, p. 623-626.
Sims, P.K, Peterman, Z.E., Hildenbrand, T.G., and Mahan, S., 2001, Precambrian basement map of the Trans-Hudson Orogen and adjacent terranes, northern Great Plains, U.S.A.: U.S. Geological Survey Miscellaneous Investigations Series Map I-2214.
Snyder, G.L., Peterman, Z.E., Frost, B.R., Grant, J.A., and Lindsley D.H., 1988, The crust of a young Earth — guide to the Precambrian continental core of southeast Wyoming: Colorado School of Mines, Professional Contributions No. 12, p. 1–34.
Snyder, G.L., Peterman, Z.E., Love, J.D., and Langstaff, G.D., 1997, Geologic map and geochronology of the Precambrian and adjacent rocks of the Dodge Ranch – Ayres Spring area, Albany County, Wyoming: U.S. Geological Survey, Miscellaneous Investigations Series Map I-2235, 3 sheets, scale 1 : 24 000.
Snyder, G.L., Budahn, J.R., Nealey, L.D., Bartel, A.J., and Ludwig, K.R., 1998, Geologic map, petrochemistry, and geochronology of the Precambrian rocks of the Bull Camp quadrangle, Albany County, Wyoming with a section on crystal differentiation in the Tony Ridge peridotite by J.W. Nicholls and G.L.Snyder: U.S. Geological Survey, Miscellaneous Investigations Series Map I-2236, 2 sheets, scale 1 …
Souders, A.K. and Frost, C.D., 2006, In suspect terrane? Provenance of the Late Archean Phantom Lake Metamorphic Suite, Sierra Madre, Wyoming: Canadian Journal of Earth Sciences, v. 43, p. 1557-1577.
Sutherland, W.M., and Luhr, S.C., 2011, Preliminary bedrock geologic map of the Farson 30’ x 60’ Quadrangle, Sweetwater, Sublette, and Fremont Counties, Wyoming: Wyoming State Geological Survey Open File Report WSGS-2011-OFR-06, scale 1:100,000, 1 sheet.
Swanson-Hysell, N.L., Avery, M.S., Zhang, Y., et al., 2021, The paleogeography of Laurentia in its early years: new constraints from the Paleoproterozoic east-central Minnesota batholith: Tectonics, v. 40(5) DOI:10.1029/2021TC006751
Swapp, S.M., Frost, C.D., Frost, B.R., Fitz-Gerald, D.B., 2018, 2.7 Ga high-pressure granulites of the Teton Range: record of Neoarchean continent collision and exhumation: Geosphere, v. 14, doi:10.1130/GES01607.1.
Van Schmus, W.R., Schneider, D.A., Holm, D.K., Dodson, S., and Nelson, B.K., 2007, New insights into the southern margin of the Archean-Proterozoic boundary in the north-central United States based on U-Pb, Sm-Nd, and Ar-Ar geochronology: Precambrian Research, v. 157, p. 80-105.
Verts, L.A., Chamberlain, K.R., and Frost, C.D., 1996, U-Pb sphene dating of metamorphism: the importance of sphene growth in the contact aureole of the Red Mountain pluton, Laramie Mountains, Wyoming: Contributions to Mineralogy and Petrology, v. 123, p. 1-14.
Wall, E.N., 2004, Petrologic, geochemical and isotopic constraints on the origin of 2.6 Ga post-tectonic granitoids of the central Wyoming province: M.S. thesis, University of Wyoming, Laramie, Wyoming.
Wall, C.J., Scoates, J.S., Weis, D., Friedman, R.M., Amini, M., and Meurer, W.P., 2018, The Stillwater Complex: integrating zircon geochronological and geochemical constraints on the age, emplacement history and crystallization of a large, open-system layered intrusion: Journal of Petrology, v. 59, p. 153-190.
Zartman, R.E. and Reed, J.C., 1998, Zircon geochronology of the Webb Canyon Gneiss and the Mount Owen Quartz Monzonite, Teton Range Wyoming: significance to dating late Archean metamorphism in the Wyoming craton: The Mountain Geologist, v. 35, p. 71-77.

## Sheet: Notes
Notes:
Detrital zircon analyses are not included in this compilation
Location precision: high=location given as UTM, Lat-Long, or precisely located on map; medium = location given to quarter-quarter-section; low = location approximate
1Location corrected, lat-long reported in Frost and Fanning (2006) was incorrect.
